# Supplementary material for: Companionship during facility-based childbirth: results from a mixed-methods study with recently delivered women and providers in Kenya
Source: Springer Nature journal article supplement (doi:10.1186/s12884-018-1806-1), 2018-05-10
Supplement: MOESM3 [file 15754826]

**Additional file 3: Consolidated criteria for reporting qualitative studies (COREQ): 32-item checklist**

| No Item                                     | Guide questions/description                                                                                                                                                                                                                           | Response                                                                                                                                                                                                                  | manuscript section                                      |
|---------------------------------------------|-------------------------------------------------------------------------------------------------------------------------------------------------------------------------------------------------------------------------------------------------------|---------------------------------------------------------------------------------------------------------------------------------------------------------------------------------------------------------------------------|---------------------------------------------------------|
| Domain 1: Research team and reflexivity     |                                                                                                                                                                                                                                                       |                                                                                                                                                                                                                           |                                                         |
| Personal Characteristics                    |                                                                                                                                                                                                                                                       |                                                                                                                                                                                                                           |                                                         |
| 1. Interviewer/facilitator                  | Which author/s conducted the interview or focus group?                                                                                                                                                                                                | First author trained research assistants to conduct interviews and FGD<br>Lead Author: MBCHB, MPH, PhD. Research assistants have college degrees, one has a nursing degree<br>Lead author was Postdoctoral fellow at UCSF | Methods: data collection paragraphs 3 and 4             |
| 2. Credentials                              | What were the researcher's credentials? E.g. PhD, MD                                                                                                                                                                                                  | All authors and research assistants are female<br>Taken qualitative methods courses and has previous qualitative research experience                                                                                      | Cover page; methods: data collection paragraphs 3 and 4 |
| 3. Occupation                               | What was their occupation at the time of the study?                                                                                                                                                                                                   |                                                                                                                                                                                                                           | N/A                                                     |
| 4. Gender                                   | Was the researcher male or female?                                                                                                                                                                                                                    |                                                                                                                                                                                                                           | Methods: data collection paragraphs 3                   |
| 5. Experience and training                  | What experience or training did the researcher have?                                                                                                                                                                                                  |                                                                                                                                                                                                                           | N/A                                                     |
| Relationship with participants              |                                                                                                                                                                                                                                                       |                                                                                                                                                                                                                           |                                                         |
| 6. Relationship established                 | Was a relationship established prior to study commencement?                                                                                                                                                                                           | No                                                                                                                                                                                                                        | N/A                                                     |
| 7. Participant knowledge of the interviewer | What did the participants know about the researcher? e.g. personal goals, reasons for doing the research<br>What characteristics were reported about the interviewer/facilitator? e.g. Bias, assumptions, reasons and interests in the research topic | Participants told purpose of the research. They did not know the researcher                                                                                                                                               | N/A                                                     |
| 8. Interviewer characteristics              |                                                                                                                                                                                                                                                       | Training                                                                                                                                                                                                                  | Methods: data collection paragraphs 3                   |
| Domain 2: study design                      |                                                                                                                                                                                                                                                       |                                                                                                                                                                                                                           |                                                         |
| Theoretical framework                       |                                                                                                                                                                                                                                                       |                                                                                                                                                                                                                           |                                                         |

|                                                                   |                                                                                                                                                          |                                                                                                                                                              |                                                            |
|-------------------------------------------------------------------|----------------------------------------------------------------------------------------------------------------------------------------------------------|--------------------------------------------------------------------------------------------------------------------------------------------------------------|------------------------------------------------------------|
| 9. Methodological orientation and Theory<br>Participant selection | What methodological orientation was stated to underpin the study? e.g. grounded theory, discourse analysis, ethnography, phenomenology, content analysis | General qualitative methods in a mixed methods study. We applied grounded theory approaches in the coding, but will not say this was a grounded theory study | N/A                                                        |
| 10. Sampling                                                      | How were participants selected? e.g. purposive, convenience, consecutive, snowball                                                                       | Purposive                                                                                                                                                    | Methods: data collection paragraphs 3 and 4                |
| 11. Method of approach                                            | How were participants approached? e.g. face-to-face, telephone, mail, email                                                                              | face to face                                                                                                                                                 | Methods: data collection paragraphs 3 and 4                |
| 12. Sample size                                                   | How many participants were in the study?                                                                                                                 | 8 FGDs with 58 women and 49 interviews with providers                                                                                                        | Methods: data collection paragraphs 3 and 4                |
| 13. Non-participation<br>Setting                                  | How many people refused to participate or dropped out? Reasons?                                                                                          | None                                                                                                                                                         | N/A                                                        |
| 14. Setting of data collection                                    | Where was the data collected? e.g. home, clinic, workplace                                                                                               | community space and clinic                                                                                                                                   | Methods: data collection paragraphs 3 and 4                |
| 15. Presence of non-participants                                  | Was anyone else present besides the participants and researchers?                                                                                        | No                                                                                                                                                           | Methods: data collection paragraphs 3 and 4                |
| 16. Description of sample<br>Data collection                      | What are the important characteristics of the sample? e.g. demographic data, date                                                                        | Interview period and demographic information provided                                                                                                        | methods: data collection paragraphs 3 and 4; Table 1 and 5 |
| 17. Interview guide                                               | Were questions, prompts, guides provided by the authors? Was it pilot tested?                                                                            | Yes                                                                                                                                                          | Supplemental file 1                                        |
| 18. Repeat interviews                                             | Were repeat interviews carried out? If yes, how many?                                                                                                    | No                                                                                                                                                           | N/A                                                        |

|                                                                              |                                                                                                                                   |                                            |                                                |
|------------------------------------------------------------------------------|-----------------------------------------------------------------------------------------------------------------------------------|--------------------------------------------|------------------------------------------------|
| 19. Audio/visual recording                                                   | Did the research use audio or visual recording to collect the data?                                                               | Yes; audio                                 | methods: data collection paragraphs 3 and 4    |
| 20. Field notes                                                              | Were field notes made during and/or after the interview or focus group?                                                           | Yes                                        | methods: data collection paragraphs 3 and 4    |
| 21. Duration                                                                 | What was the duration of the interviews or focus group?                                                                           | 90 mins for FGD and an hour for interviews | methods: data collection paragraphs 3 and 4    |
| 22. Data saturation                                                          | Was data saturation discussed?                                                                                                    | Yes                                        | methods: data analysis paragraphs 2            |
| 23. Transcripts returned<br>Domain 3: analysis and findings<br>Data analysis | Were transcripts returned to participants for comment and/or correction?                                                          | No                                         | N/A                                            |
| 24. Number of data coders                                                    | How many data coders coded the data?                                                                                              | 2                                          | methods: data analysis paragraphs 2            |
| 25. Description of the coding tree                                           | Did authors provide a description of the coding tree?                                                                             | Yes                                        | methods: data analysis paragraphs 2            |
| 26. Derivation of themes                                                     | Were themes identified in advance or derived from the data?                                                                       | derived from data                          | methods: data analysis paragraphs 2            |
| 27. Software                                                                 | What software, if applicable, was used to manage the data?                                                                        | atlas ti                                   | methods: data analysis paragraphs 2            |
| 28. Participant checking<br>Reporting                                        | Did participants provide feedback on the findings?                                                                                | No                                         | N/A                                            |
| 29. Quotations presented                                                     | Were participant quotations presented to illustrate the themes / findings? Was each quotation identified? e.g. participant number | Yes                                        | Results: qualitative section from paragraph 12 |
| 30. Data and findings consistent                                             | Was there consistency between the data presented and the findings?                                                                | Yes                                        | Results: qualitative section from paragraph 12 |
| 31. Clarity of major themes                                                  | Were major themes clearly presented in the findings?                                                                              | Yes                                        | Results: qualitative section from paragraph 12 |

32. Clarity of minor themes

Is there a description of diverse cases or discussion of minor themes?

Yes; results

Results: qualitative section from paragraph 12
